# Supplementary material for: A guideline to optimizing the performance of V 2 O 5 –MoO 3 /TiO 2 catalysts for low-temperature SCR denitrification in industrial application
Source: Royal Society of Chemistry journal article supplement (doi:10.1039/d5im00055f), 2025-07-02
Supplement: d5im00055f1.pdf [file d5im00055f1.pdf]

Supplementary data

Table S1. Comparison of the performance with other reported catalyst

| Catalyst                                                          | Conditions                                                                                                                      | Reaction<br>temperatures/°C | Conversion<br>of NO <sub>x</sub> /% | Reference |
|-------------------------------------------------------------------|---------------------------------------------------------------------------------------------------------------------------------|-----------------------------|-------------------------------------|-----------|
| FeM36 zeolites                                                    | NO (800 ppm)<br>O <sub>2</sub> (3.5 vol%)                                                                                       | 150                         | 50                                  | [S1]      |
| CSWB/T                                                            | SO <sub>2</sub> (200 ppm)<br>H <sub>2</sub> O (5 vol%)                                                                          | 200                         | 65                                  | [S2]      |
| MnFe/TiO <sub>2</sub> -h-0h                                       | NO (1000 ppm)<br>H <sub>2</sub> O (2.3 vol%)<br>O <sub>2</sub> (4 vol%)                                                         | 150                         | 37                                  | [S3]      |
| Cr <sub>0.0006</sub> Mn <sub>0.05</sub> CeTiO <sub>x</sub>        | NO (500 ppm)                                                                                                                    | 150                         | 83                                  | [S4]      |
| V-Sb/Ti                                                           | NO (300 ppm)<br>H <sub>2</sub> O (5 vol%)<br>O <sub>2</sub> (5 vol%)                                                            | 200                         | 68                                  | [S5]      |
| γ-Fe <sub>2</sub> O <sub>3</sub>                                  | NO (500 ppm)<br>SO <sub>2</sub> (100 ppm)<br>O <sub>2</sub> (5 vol%)                                                            | 200                         | 80                                  | [S6]      |
| FeW                                                               | NO (500 ppm)<br>SO <sub>2</sub> (200 ppm)<br>O <sub>2</sub> (3 vol%)                                                            | 150                         | 18                                  | [S7]      |
| V <sub>2</sub> O <sub>5</sub> -MoO <sub>3</sub> /TiO <sub>2</sub> | NO(700 mg/Nm <sup>3</sup> or 523 ppm)<br>SO <sub>2</sub> (2000 mg/Nm <sup>3</sup> or 700 ppm)<br>O <sub>2</sub> (4 vol%)        | 200                         | 73                                  | This Work |
| V <sub>2</sub> O <sub>5</sub> -MoO <sub>3</sub> /TiO <sub>2</sub> | NO(500-800 mg/Nm <sup>3</sup> or 370-597 ppm)<br>SO <sub>2</sub> (35 mg/Nm <sup>3</sup> or 12 ppm)<br>O <sub>2</sub> (4-6 vol%) | 160-180                     | 75                                  | This Work |

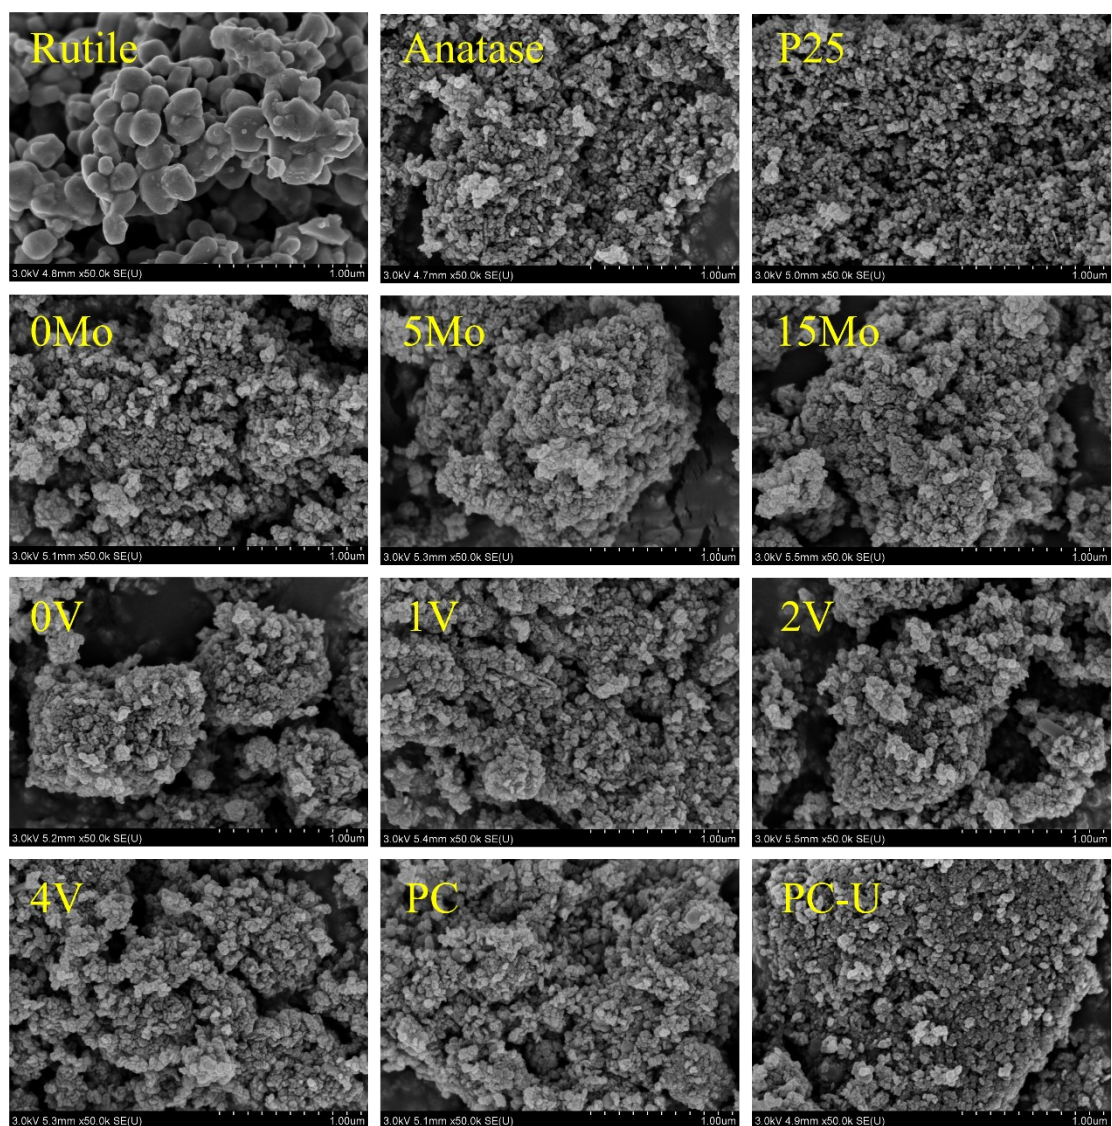

Figure S1. SEM images.



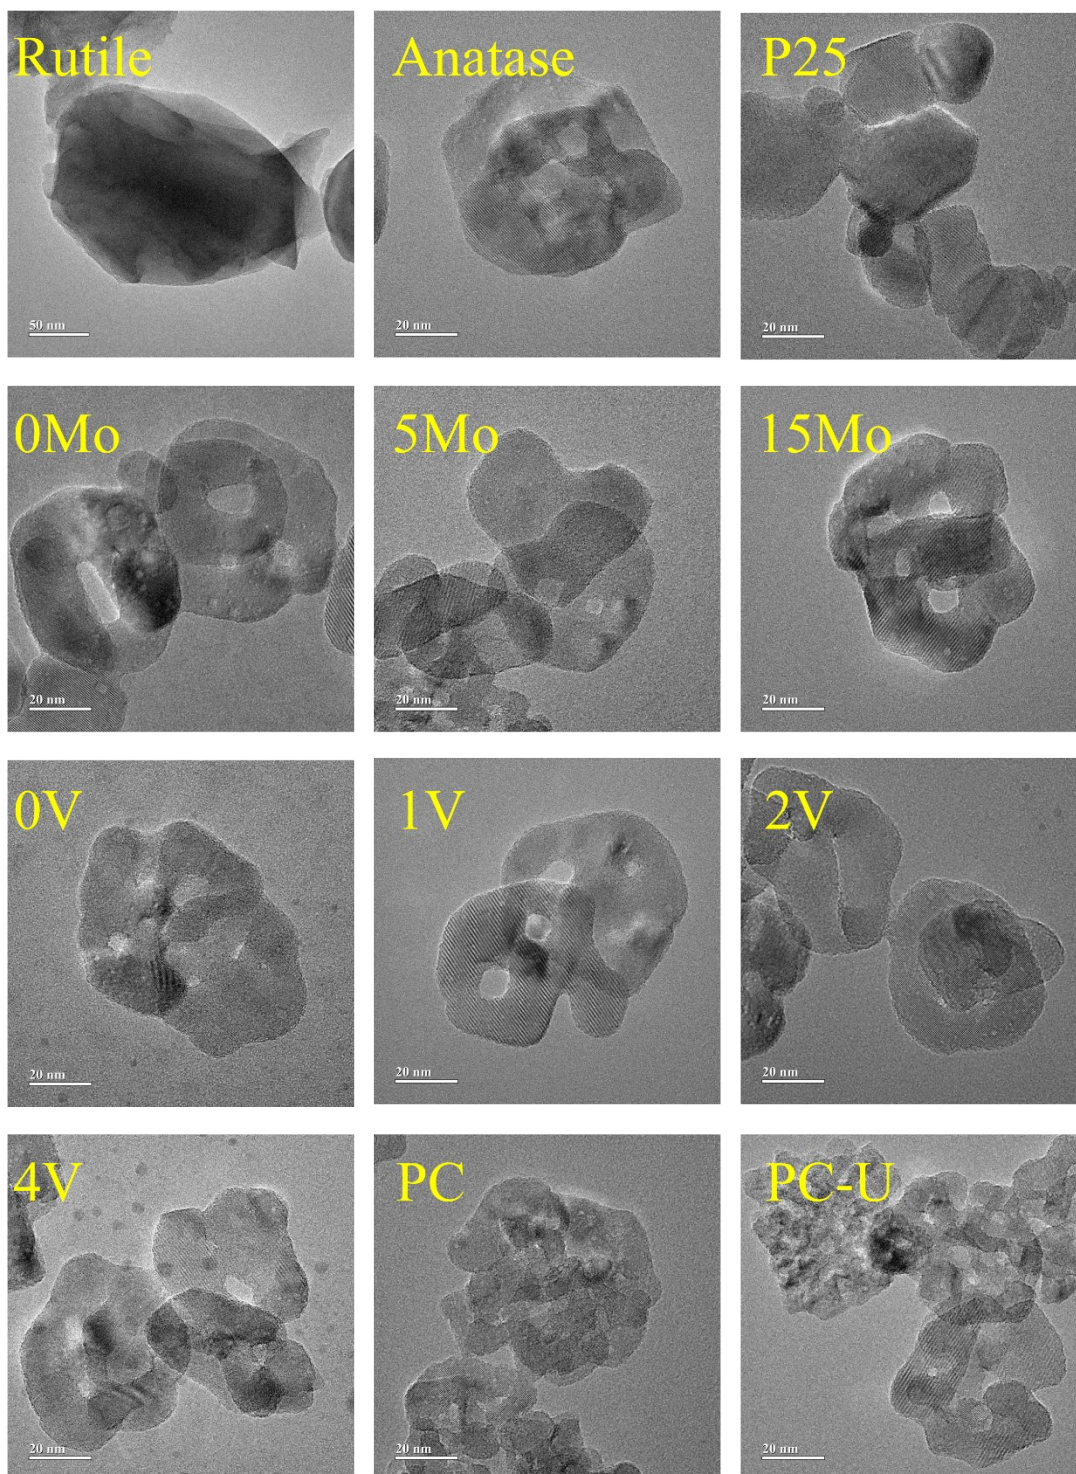

Figure S2. TEM images.



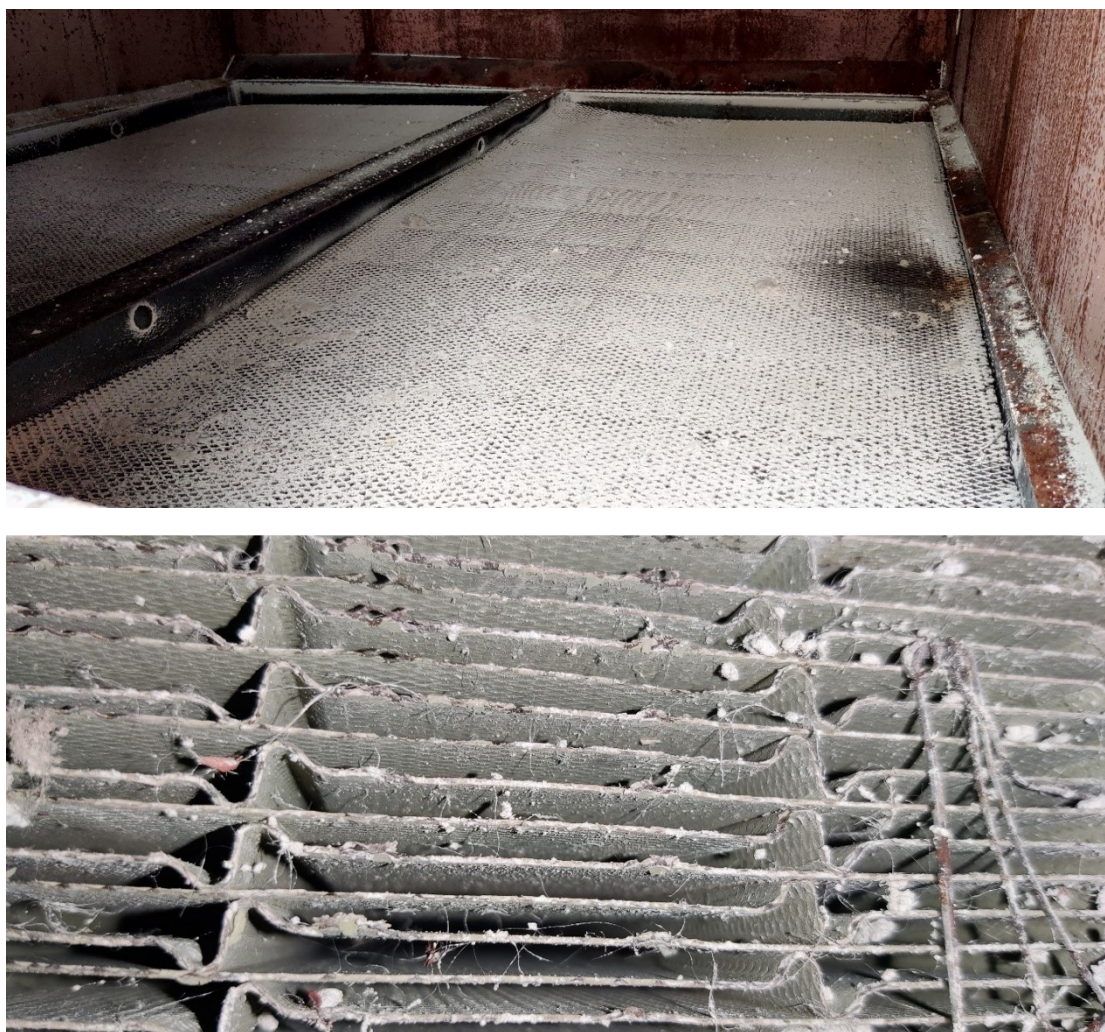

Figure S3. Plate type catalyst used for 2 years.

## Notes and references

- [S1] A. Szymaszek-Wawryca, U. Diaz, B. Samojeden, M. Motak, Catalytic Performance of One-Pot Synthesized Fe-MWW Layered Zeolites (MCM-22, MCM-36, and ITQ-2) in Selective Catalytic Reduction of Nitrogen Oxides with Ammonia, *Molecules* 27 (2022) 2983, <https://doi.org/10.3390/molecules27092983>.
- [S2] Q. Jin, M. Chen, X. Tao, B. Lu, J. Shen, Y. Shen, Y. Zeng, Component synergistic catalysis of Ce-Sn-W-Ba-O<sub>x</sub>/TiO<sub>2</sub> in selective catalytic reduction of NO with ammonia, *Appl. Surf. Sci.* 512 (2020) 145757, <https://doi.org/10.1016/j.apsusc.2020.145757>.
- [S3] L. Schill, S. S. R. Putluru, R. Fehrmann, A. D. Jensen, Low-Temperature NH<sub>3</sub>-SCR of NO on Mesoporous Mn<sub>0.6</sub>Fe<sub>0.4</sub>/TiO<sub>2</sub> Prepared by a Hydrothermal Method, *Cata. Lett.* 144 (2014) 395-402, <https://doi.org/10.1007/s10562-013-1176-2>.
- [S4] W. Liu, Z. Gao, M. Sun, J. Gao, L. Wang, X. Zhao, R. Yang, L. Yu, One-pot synthesis of Cr<sub>α</sub>Mn<sub>β</sub>CeTiO<sub>x</sub> mixed oxides as NH<sub>3</sub>-SCR catalysts with enhanced low-temperature catalytic activity and sulfur resistance, *Chem. Eng. Sci.* 251 (2022) 117450, <https://doi.org/10.1016/j.ces.2022.117450>.
- [S5] Y. K. Bae, T. Kim, J. Kim, Y. Kim, K. Ha, H. Chae, Enhanced SO<sub>2</sub> tolerance of V<sub>2</sub>O<sub>5</sub>-Sb<sub>2</sub>O<sub>3</sub>/TiO<sub>2</sub> catalyst for NO reduction with co-use of ammonia and liquid ammonium nitrate, *J. Ind. Eng. Chem.* 96 (2021) 277-283,

<https://doi.org/10.1016/j.jiec.2021.01.029>.

[S6] Y. Yu, W. Tan, D. An, X. Wang, A. Liu, W. Zou, C. Tang, C. Ge, Q. Tong, J. Sun, L. Dong, Insight into the SO<sub>2</sub> resistance mechanism on  $\gamma$ -Fe<sub>2</sub>O<sub>3</sub> catalyst in

NH<sub>3</sub>-SCR reaction: A collaborated experimental and DFT study. *Appl. Catal. B.* 281 (2021) 119544, <https://doi.org/10.1016/j.apcatb.2020.119544>.

[S7] H. Wang, Z. Qu, S. Dong, C. Tang, Mechanistic investigation into the effect of sulfuration on the FeW catalysts for the selective catalytic reduction of NO<sub>x</sub> with NH<sub>3</sub>. *ACS Appl. Mater. Interfaces* 9 (2017) 7017–7028,

<https://doi.org/10.1021/acsami.6b14031>.
